# Supplementary material for: Amplified Ground Shaking Triggered by Subterranean Gas Expansion: Unveiling a New Geohazard Following the 2024 Noto Peninsula Earthquake
Source: Research Square preprint supplement (doi:10.21203/rs.3.rs-7238725/v1), 2025-08-25
Supplement: Supplementary file 1 [file fe2ce41ca9e5fa4e60161eb9.docx]

Supplementally Information

**Amplified Ground Shaking Triggered by Subterranean Gas Expansion: Unveiling a New Geohazard Following the 2024 Noto Peninsula Earthquake**

Yuji Enomoto, Shinshu University

An additional note to the previous report1 on the earthquake-induced fires associated with the 2024 Noto Peninsula earthquake

Fig. SI-1 Distribution of fire-detected areas at 01:54 JST on January 2, 2024, as observed by the infrared sensor onboard the NOAA-20 satellite (Source: National Institute for Land and Infrastructure Management; Building Research Institute3). **Inset photographs (top):** Aerial view of Kawai-machi at 19:56 JST on January 1, 2024 (left; Source: Kyodo News5), and the burnt remains in Nafune-machi, photographed by Y.E. on April 23, 2024 (right).

**Fig. SI-2** a) Still frame from a video of the fire in Kawai-machi, Wajima City, taken from a helicopter shortly before 19:45 JST (approximately 20 minutes after the fire was first detected). This image is identical to Fig. 2a1 previously published (Source: Nippon TV4). The circled area shows a fountain-like fire jet and a linear row of flames erupting from the ground. b) Groundwater containing a high concentration of humic substances, sampled near the fire site on August 8, 2024.c) Blackened deposits observed along the linear flame trace shown in panel a. Inset: collected sample for EPMA analysis.

Fig. SI-3 Footage around 21:00 JST on Jan.1, 2024 near the area shown in Fig. SI2a. a) A pale blue flame likely caused by the complete combustion of methane. b) Flashes of intense blue light, possibly due to the emission from burning hydrogen sulfide (Source: TV Kanazawa9)

Fig. SI-4 a) EPMA spectrum of the blackened deposit. b) Composition sensitive secondary electron image. c–f) Elemental distribution images of C, Si, O and Cl, respectively.
